# Supplementary material
Source: PubMed Central journal article supplement (PMC6871001)
Supplement: 41592_2013_BFnmeth2651_MOESM332_ESM.pdf [file 41592_2013_BFnmeth2651_MOESM332_ESM.pdf]

|                                |                                                 |
|--------------------------------|-------------------------------------------------|
| <b>Journal: Nature Methods</b> |                                                 |
| <b>Article Title:</b>          | Network-based stratification of tumor mutations |
| <b>Corresponding Author:</b>   | Trey Ideker                                     |

| Supplementary Item      | Title or Caption                                                                                                                     |
|-------------------------|--------------------------------------------------------------------------------------------------------------------------------------|
| Supplementary Figure 1  | An overview of the somatic mutation landscape of TCGA ovarian cancer cohort.                                                         |
| Supplementary Figure 2  | Simulating across different networks                                                                                                 |
| Supplementary Figure 3  | Ovarian cancer association with overall survival                                                                                     |
| Supplementary Figure 4  | Lung cancer association with overall survival                                                                                        |
| Supplementary Figure 5  | Uterine cancer association with histological type                                                                                    |
| Supplementary Figure 6  | Standard predictors of survival are independent of ovarian subtype                                                                   |
| Supplementary Figure 7  | A network view of genes with high network smoothed mutation scores in ovarian cancer, HumanNet, subtype 2 relative to other subtypes |
| Supplementary Figure 8  | A network view of genes with high network smoothed mutation scores in ovarian cancer, HumanNet, subtype 3 relative to other subtypes |
| Supplementary Figure 9  | A network view of genes with high smoothed mutation scores in ovarian cancer, HumanNet, subtype 4 relative to other subtypes.        |
| Supplementary Figure 10 | A network view of genes with high smoothed mutation scores in uterine cancer, STRING, subtype 1 relative to other subtypes.          |
| Supplementary Figure 11 | A network view of genes with high smoothed mutation scores in uterine cancer, STRING, subtype 2 relative to other subtypes.          |
| Supplementary Figure 12 | A network view of genes with high smoothed mutation scores in uterine cancer, STRING, subtype 3 relative to other subtypes.          |
| Supplementary Figure 13 | A network view of genes with high smoothed mutation scores in lung cancer, HumanNet, subtype 1 relative to other subtypes.           |
| Supplementary Figure 14 | A network view of genes with high smoothed mutation scores in lung cancer, HumanNet, subtype 2 relative to other subtypes.           |
| Supplementary Figure 15 | A network view of genes with high smoothed mutation scores in lung cancer, HumanNet, subtype 3 relative to other subtypes.           |
| Supplementary Figure 16 | A network view of genes with high smoothed mutation scores in lung cancer, HumanNet, subtype 5 relative to other subtypes.           |

|                         |                                                                                                                             |
|-------------------------|-----------------------------------------------------------------------------------------------------------------------------|
| Supplementary Figure 17 | From mutation-derived subtypes to expression signatures                                                                     |
| Supplementary Figure 18 | Standard consensus clustering NMF used to recover subtypes in the Tothill <i>et al.</i> expression cohort of ovarian tumors |
| Supplementary Figure 19 | Effects of progressively permuting proportions of the lung cancer dataset                                                   |
| Supplementary Table 1   | Summary of gene interaction networks                                                                                        |

| Source data figure     | File name                  |
|------------------------|----------------------------|
| Figure 5, Supp Fig 7-9 | OV_HM90_K4_SAM_diff.xlsx   |
| Supp Fig. 10-12        | UCEC_ST90_K3_SAM_diff.xlsx |
| Supp Fig 13-16         | LUAD_ST90_K3_SAM_diff.xlsx |

## Supplementary Figure 1

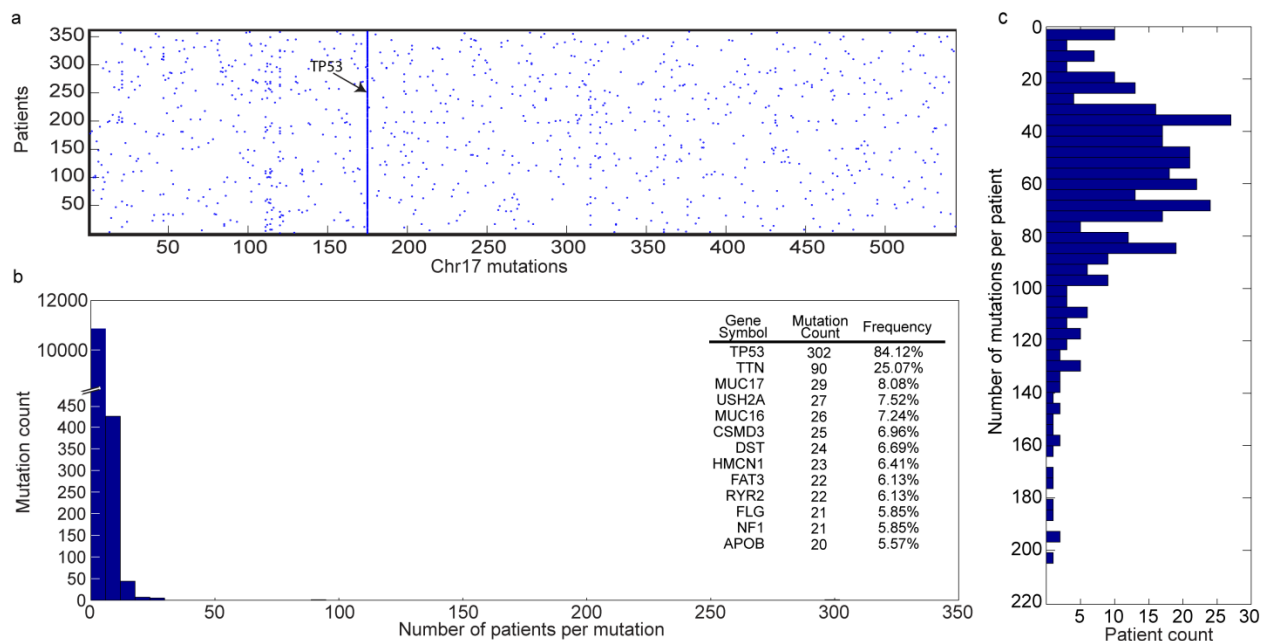

**Supplementary Figure 1. An overview of the somatic mutation landscape of TCGA ovarian cancer cohort.** (a) Somatic mutations along the length of chromosome 17. (b) A histogram summing the frequency of mutations per gene for the entire exome. (c) A histogram summing the frequency of genes mutated per patient in the cohort.

## Supplementary Figure 2

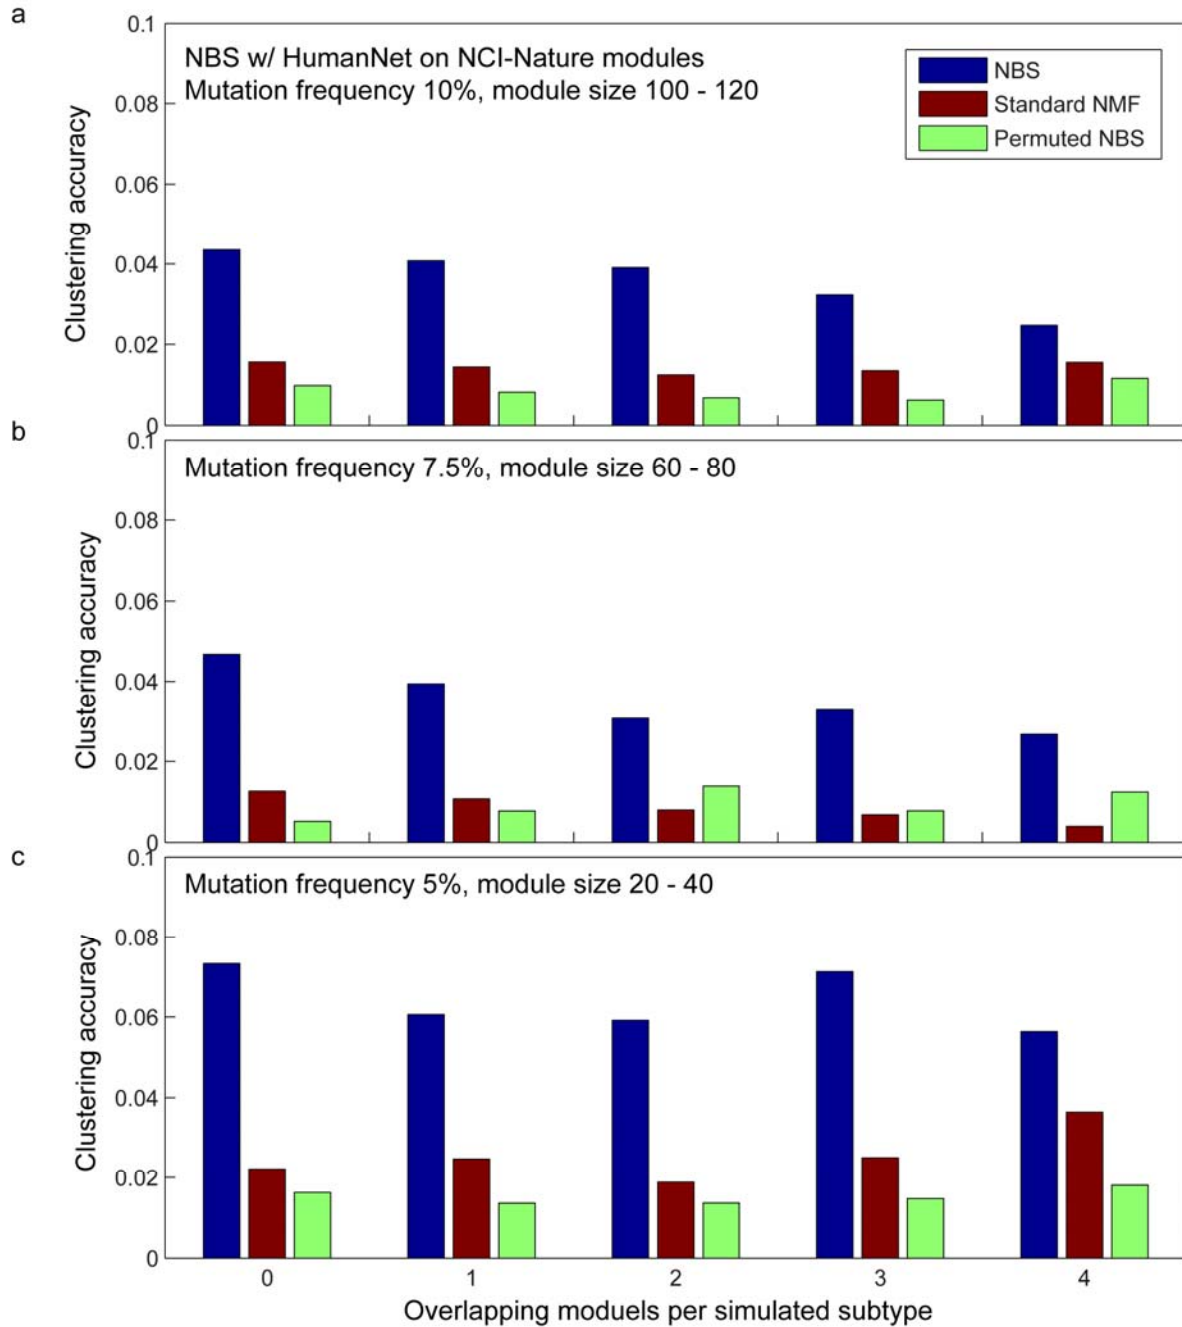

**Supplementary Figure 2. Simulating across different networks.** In this simulation network modules from the NCI-Nature cancer pathways network were used for the simulation and were recovered by NBS using the HumanNet network. Each subtype included between 2-6 driver modules totaling the specified size of genes and the driver gene frequency. Driver frequencies of 10%, 7.5%, 5% and driver modules comprising 100-120, 60-80, 20-40 were used in panels (a),(b) and (c) respectively. Furthermore, a subset (0-4) of the modules was assigned to overlap across multiple subtypes.

### Supplementary Figure 3

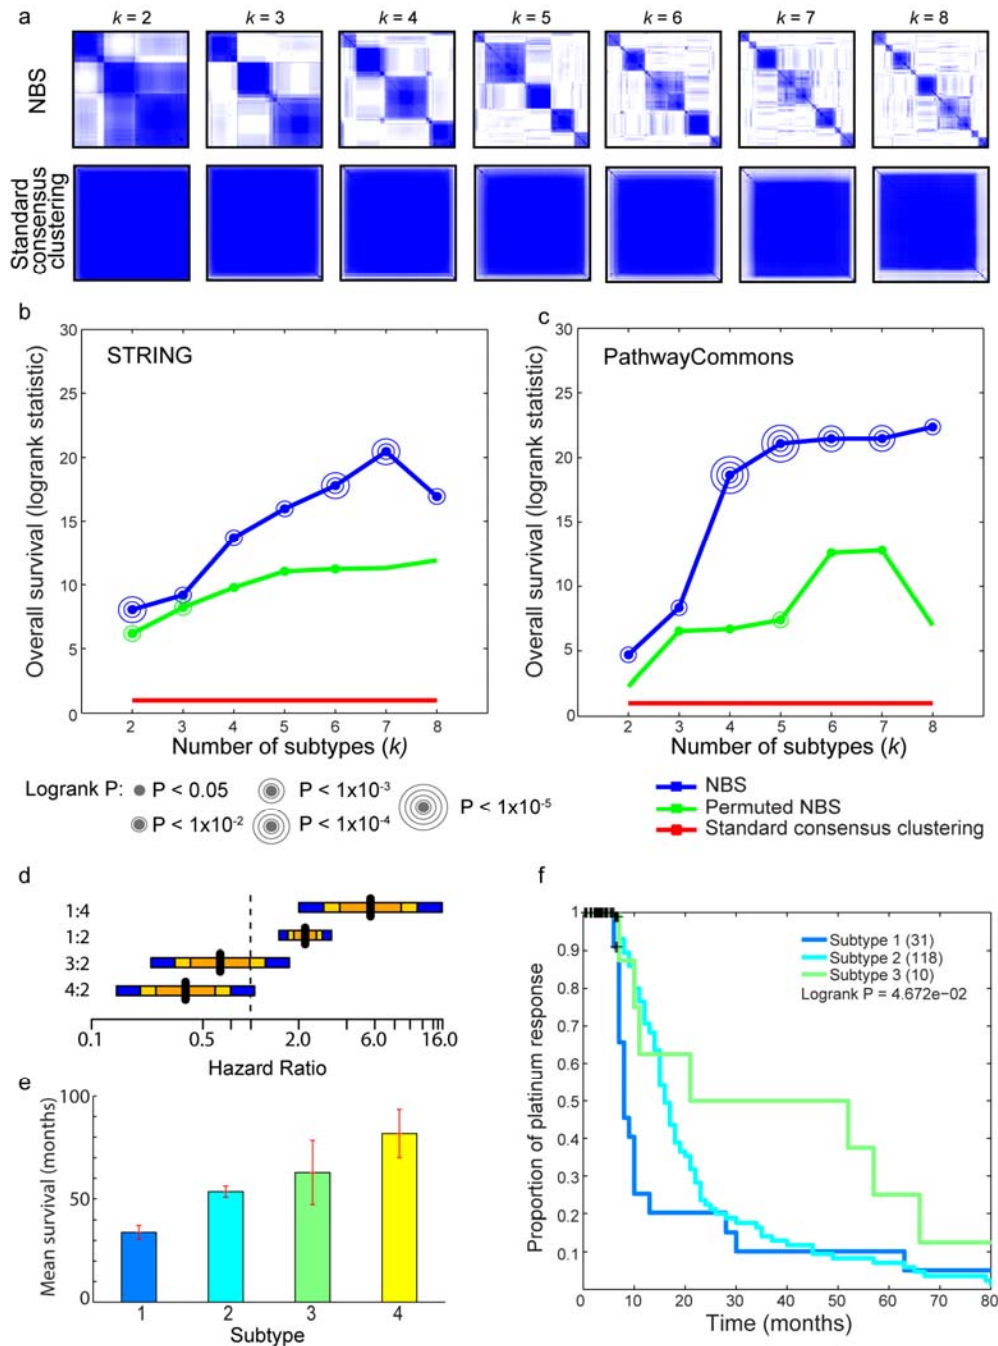

**Supplementary Figure 3. Ovarian cancer association with overall survival.** (a) Co-clustering matrices for ovarian cancer patients, comparing NBS (HumanNet) to standard consensus clustering. (b-c) Cox proportional hazards model logrank statistic for STRING and PathwayCommons. (d) Hazard ratio of each of the HumanNet subtypes compared to subtype 2 with confidence intervals (0.95, 0.8, 0.6 denoted in blue, yellow and orange respectively). (e) Mean and S.E survival in months for each of the subtypes. (f) A Kaplan-Meier plot of the probability of developing platinum drug resistance for HumanNet with four clusters, Logrank P=0.046. (Subtype 4 is dropped due to missing annotations for PFI for the majority of patients).

## Supplementary Figure 4

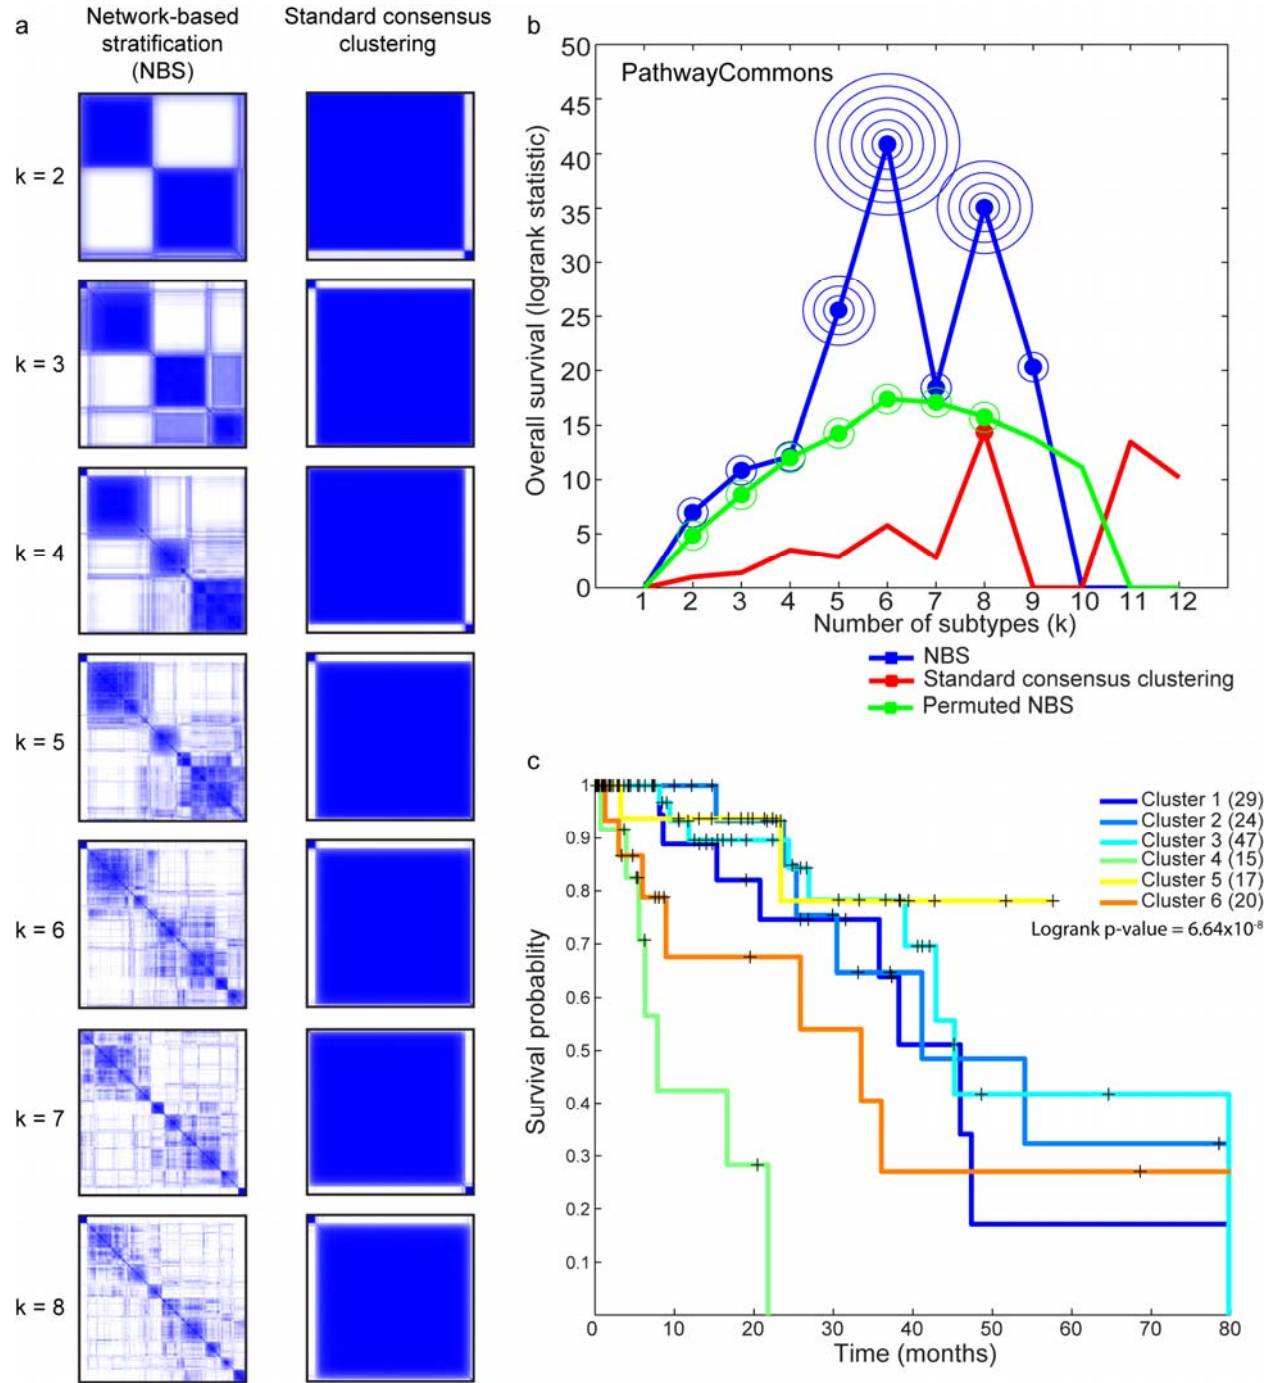

**Supplementary Figure 4. Lung cancer association with overall survival.** (a) Co-clustering matrices for lung cancer patients, comparing NBS (HumanNet) to standard consensus clustering. (b) Lung cancer patient survival cox proportional hazard model logrank statistic for PathwayCommons. (c) A Kaplan-Meier survival plot with six subtypes.

## Supplementary Figure 5

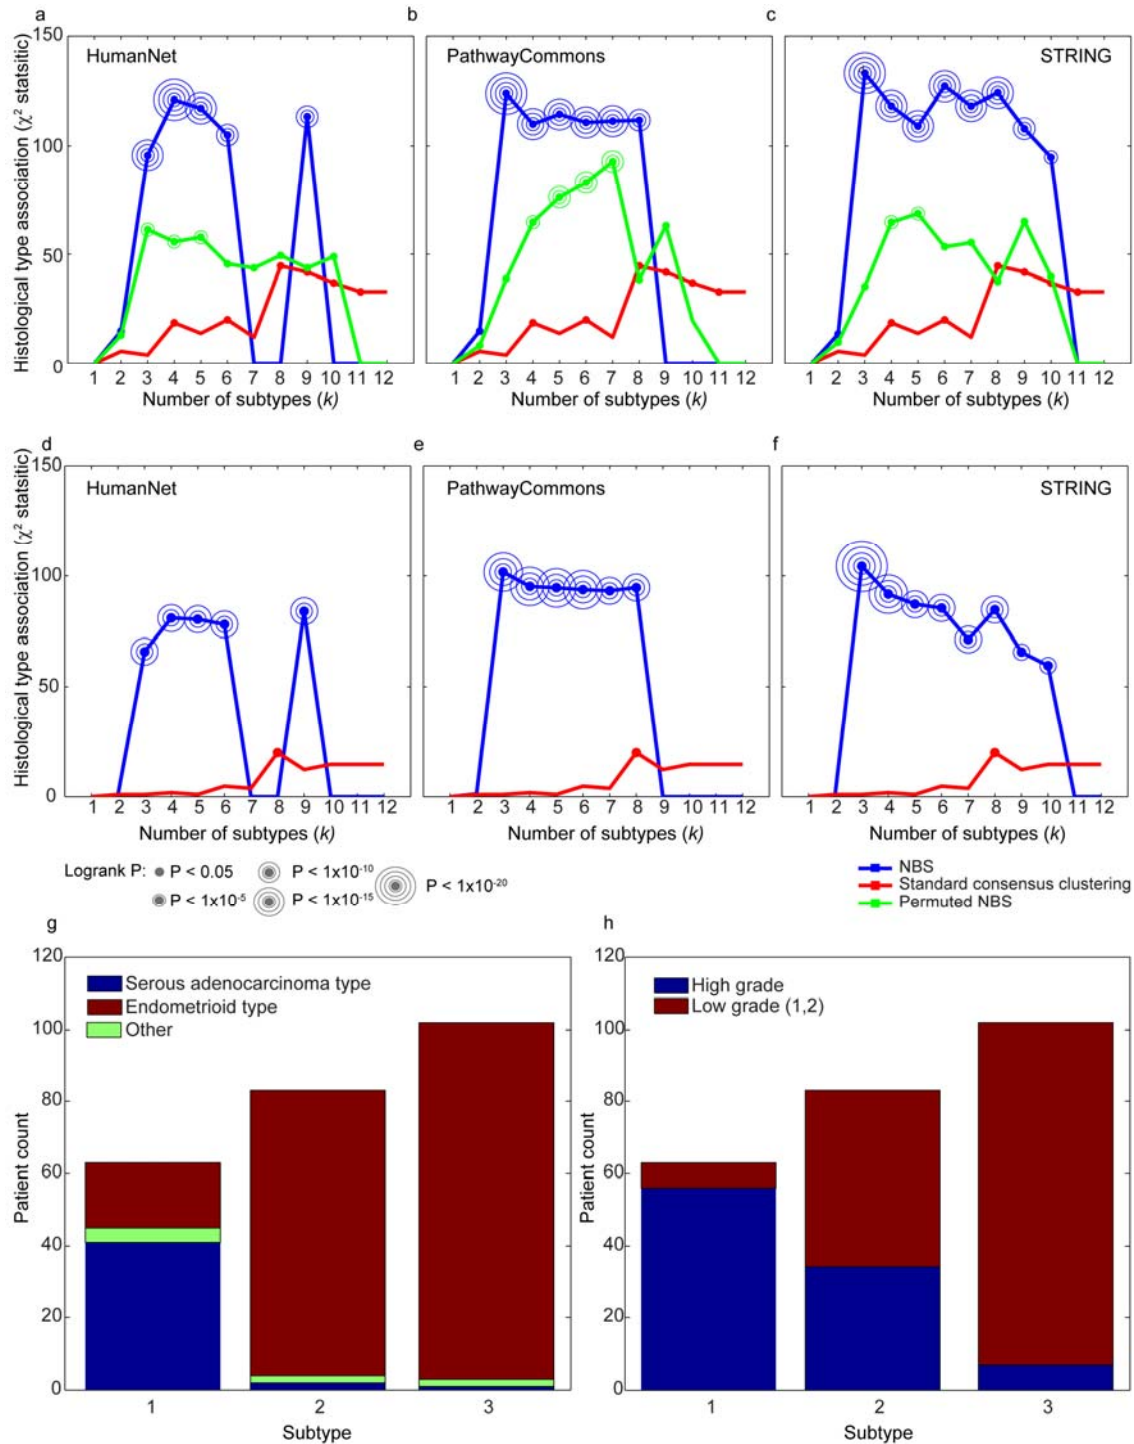

**Supplementary Figure 5. Uterine cancer association with histological type.** (a-c) Association with histological subtype vs. the number of clusters (K). (d-f) Association with tumor grade vs. the number of clusters (K) (g) Summary of histological types for each subtype. (h) Summary of tumor grade vs each subtype.

## Supplementary Figure 6

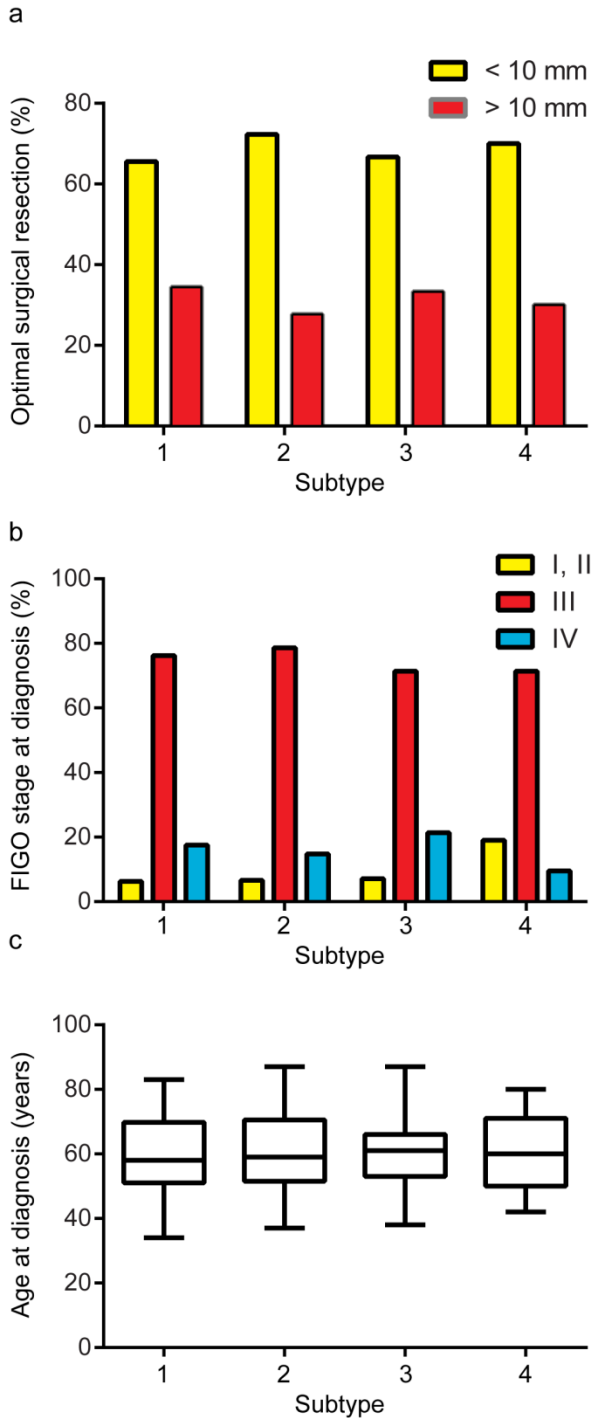

**Supplementary Figure 6. Standard predictors of survival are independent of ovarian subtype.** (a) Percentage of patients receiving an optimal surgical resection (defined as less than 10mm of residual tumor) does not vary significantly between subtypes ( $\chi^2$  P-value = 0.77). (b) Federation of Gynaecological Oncologists (FIGO) tumor stage does not show evidence for dependence on tumor subtype ( $\chi^2$  P-value = 0.48). (c) Age at diagnosis does not show dependence on tumor subtype (One-way ANOVA P-value = 0.89).



## Supplementary Figure 7

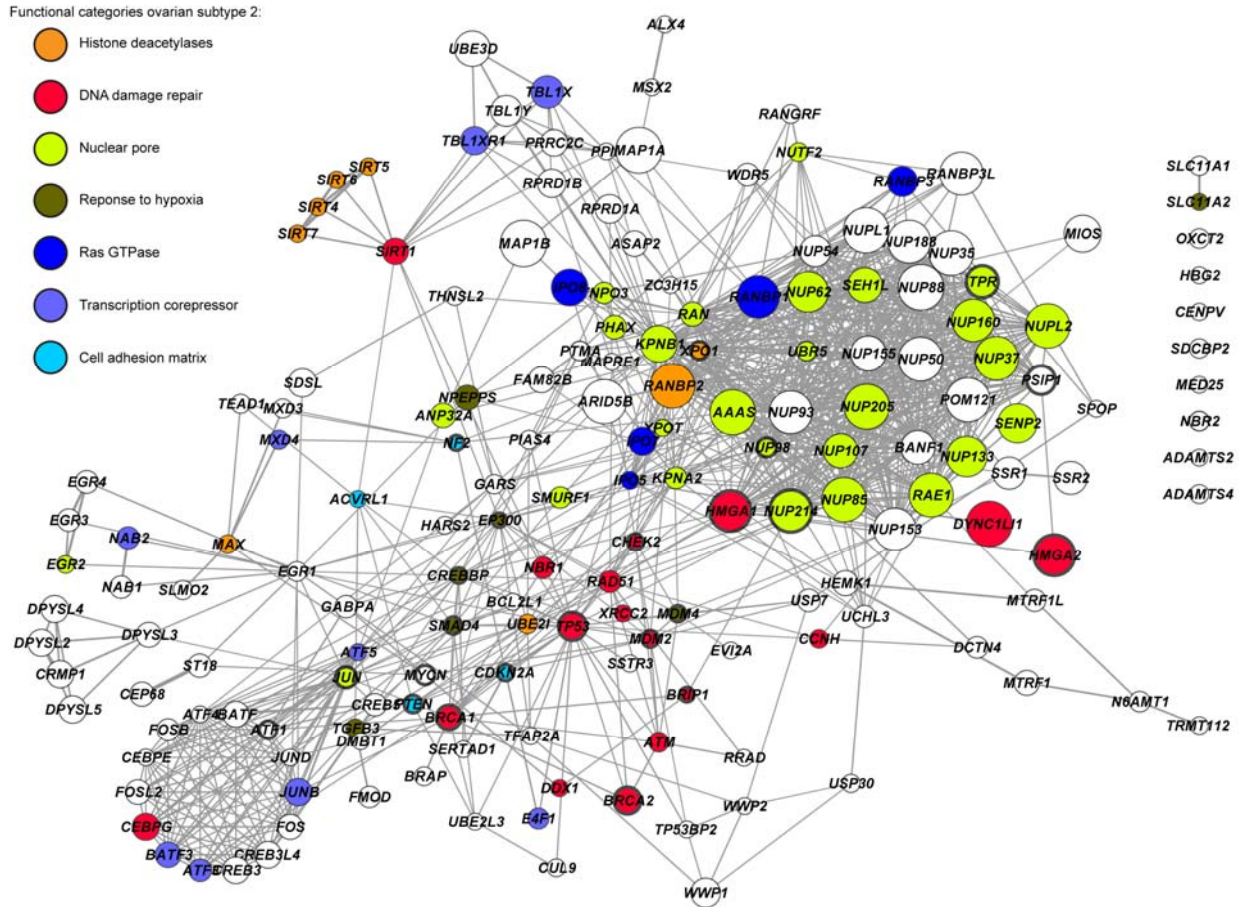

**Supplementary Figure 7. A network view of genes with high network smoothed mutation scores in ovarian, HumanNet, subtype 2 relative to other subtypes.** Node size corresponds to smoothed mutation score. Node color corresponds to a set of functional classes of interest recovered through manual examination of the resulting network with the aid of the GeneMania Cytoscape plugin. Thickened node outlines indicate genes which are known cancer genes from the Sanger list of cancer genes.



## Supplementary Figure 8

Functional categories ovarian subtype 2:

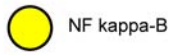

NF kappa-B

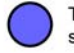

Type I interferon mediated signalling

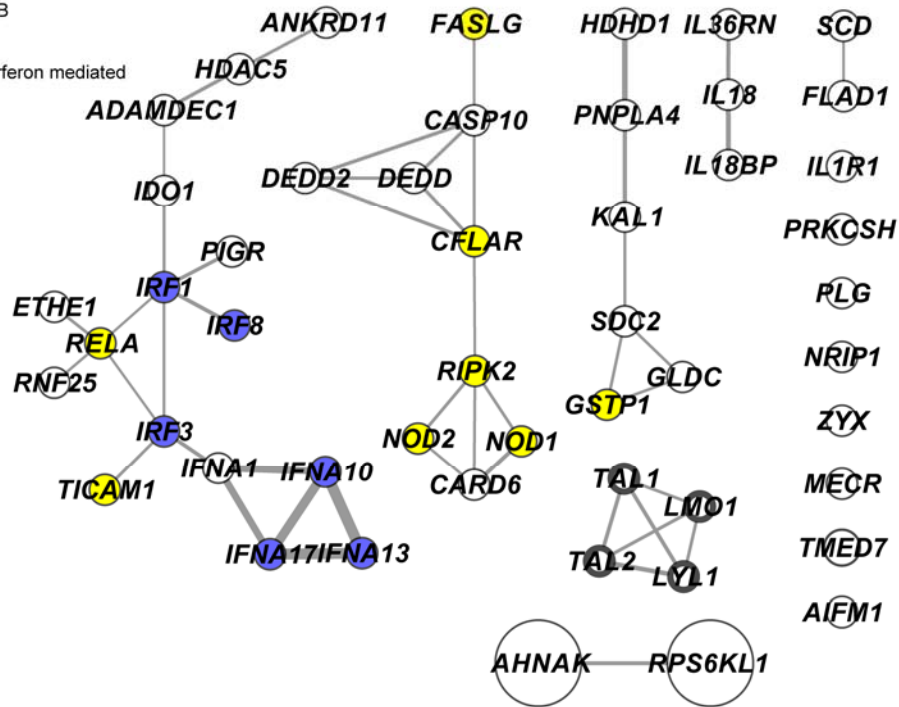

**Supplementary Figure 8. A network view of genes with high network smoothed mutation scores in ovarian, HumanNet, subtype 3 relative to other subtypes.** Node size corresponds to smoothed mutation score. Node color corresponds to a set of functional classes of interest recovered through manual examination of the resulting network with the aid of the GeneMania Cytoscape plugin. Thickened node outlines indicate genes which are known cancer genes from the Sanger list of cancer genes.

## Supplementary Figure 9

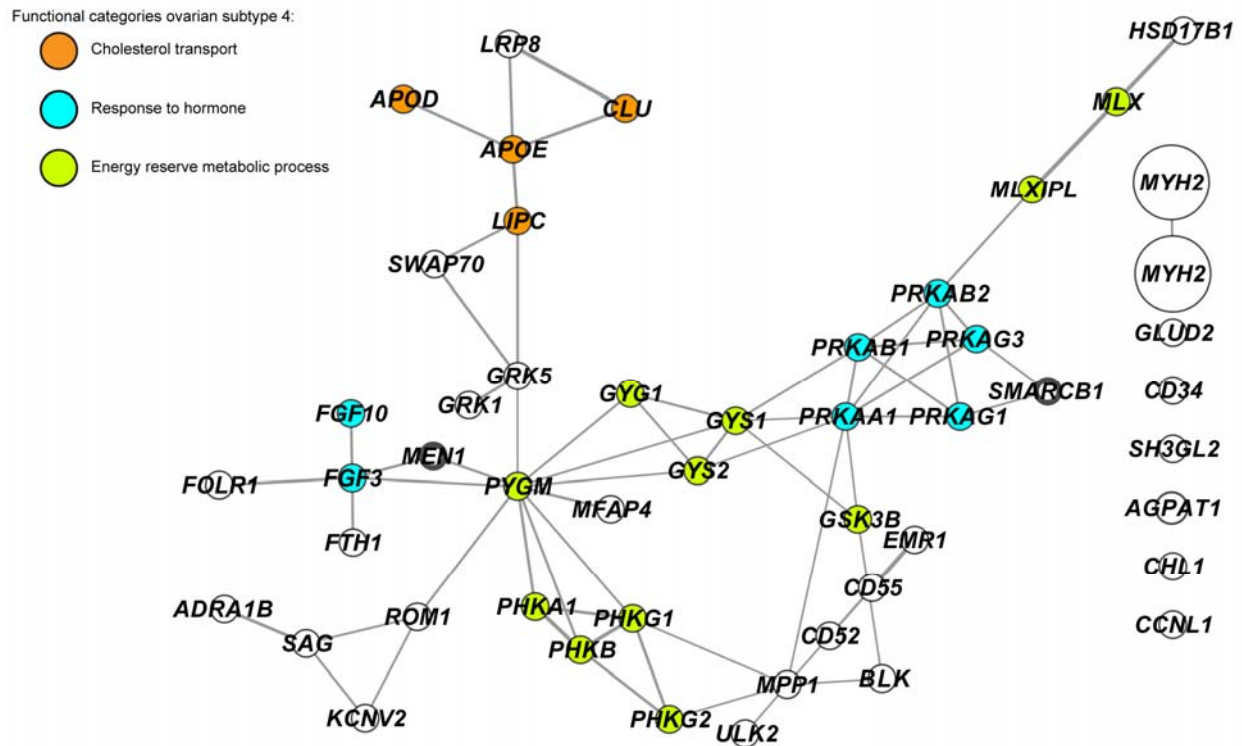

**Supplementary Figure 9.** A network view of genes with high smoothed mutation scores in ovarian, HumanNet, subtype 4 relative to other subtypes. Node size corresponds to smoothed mutation scores. Node color corresponds to a set of functional classes of interest recovered through manual examination of the resulting network with the aid of the GeneMania Cytoscape plugin. Thickened node outlines indicate genes which are known cancer genes from the Sanger list of cancer genes.

## Supplementary Figure 10

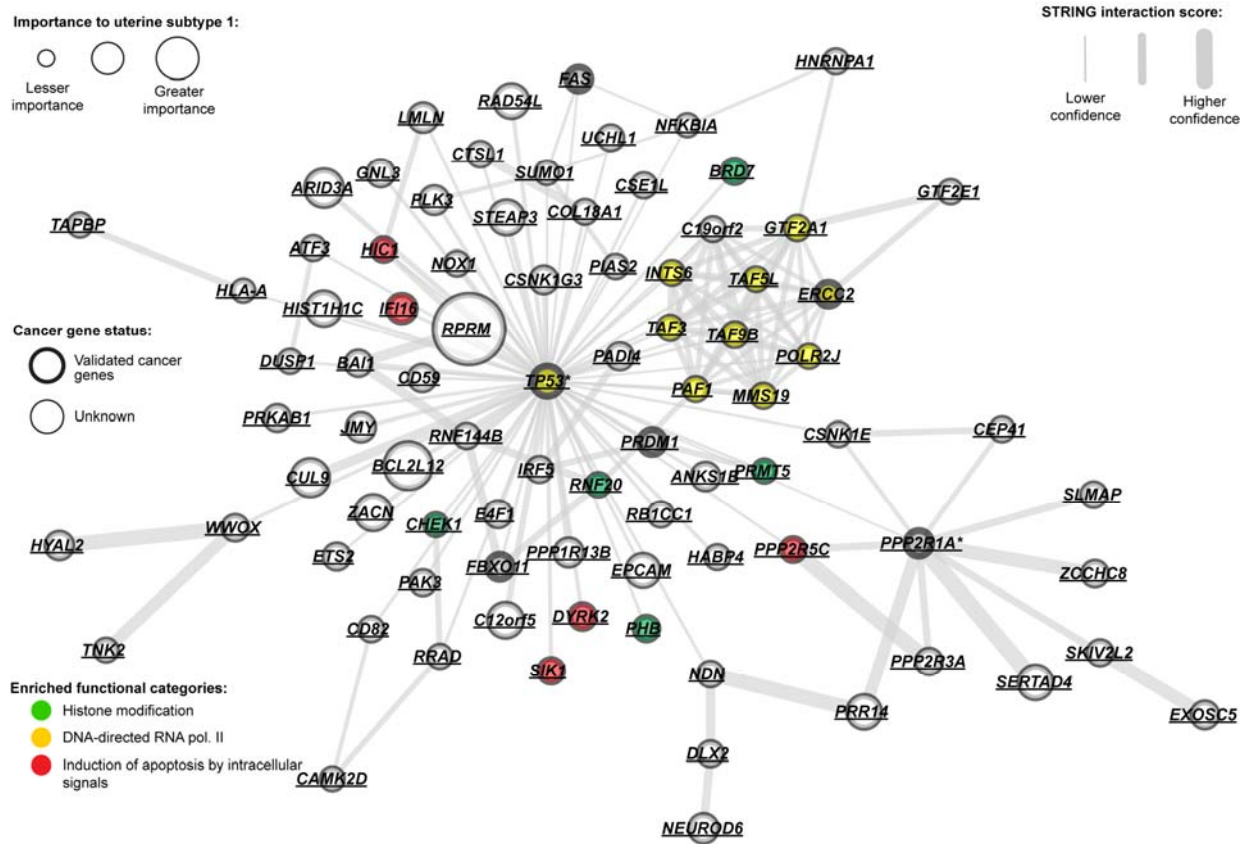

**Supplementary Figure 10.** A network view of genes with high smoothed mutation scores in uterine cancer, **STRING**, subtype 1 relative to other subtypes. Node size corresponds to smoothed mutation scores. Node color corresponds to a set of functional classes of interest recovered through manual examination of the resulting network with the aid of the GeneMania Cytoscape plugin. Thickened node outlines indicate genes which are known cancer genes from the Sanger list of cancer genes. Edge thickness corresponds to relative edge confidence in the network, underlined gene names indicate the gene is mutated in this subtype.

# Supplementary Figure 11

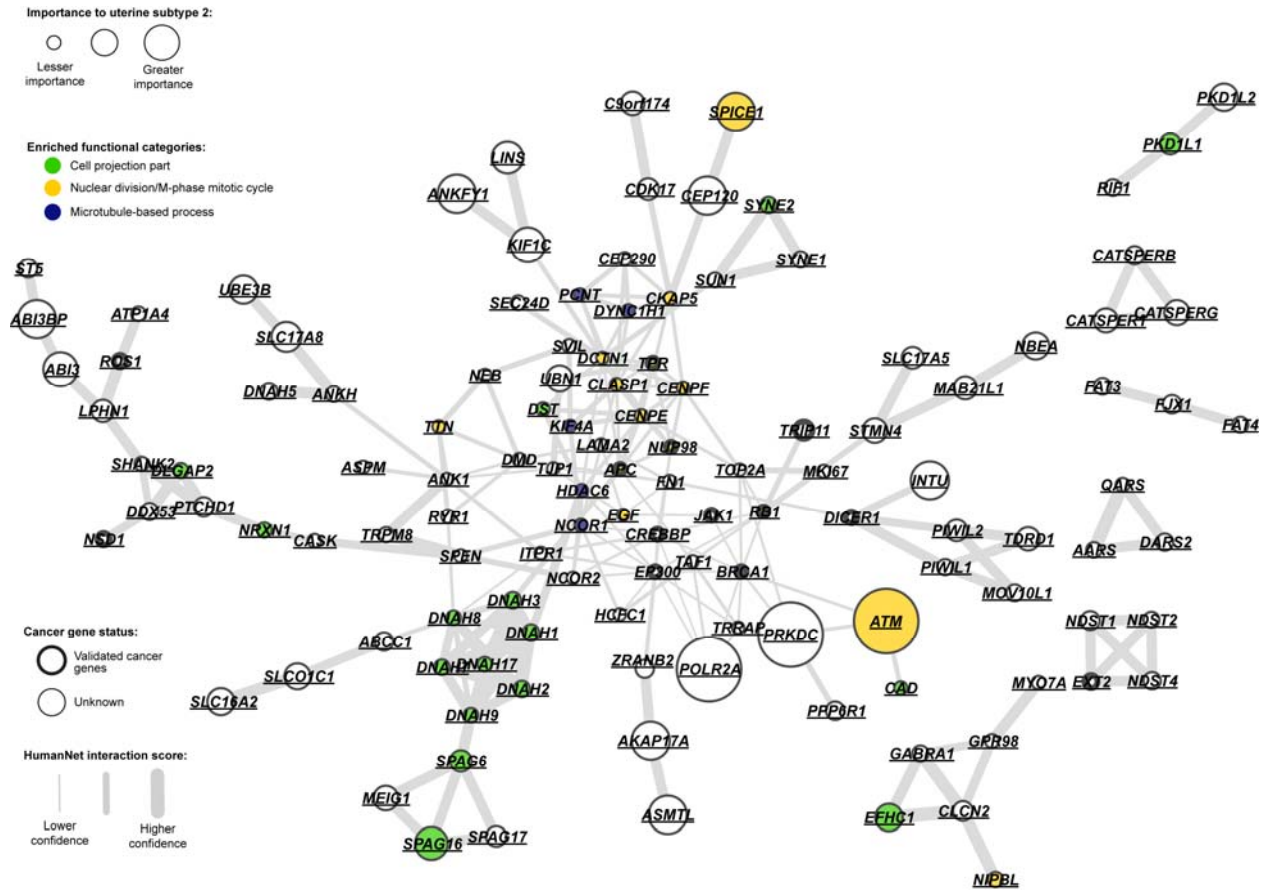

**Supplementary Figure 11. A network view of genes with high smoothed mutation scores in uterine cancer, STRING, subtype 2 relative to other subtypes.** Node size corresponds to smoothed mutation scores. Node color corresponds to a set of functional classes of interest recovered through manual examination of the resulting network with the aid of the GeneMania Cytoscape plugin. Thickened node outlines indicate genes which are known cancer genes from the Sanger list of cancer genes. Edge thickness corresponds to relative edge confidence in the network, underlined gene names indicate the gene is mutated in this subtype.

## Supplementary Figure 12

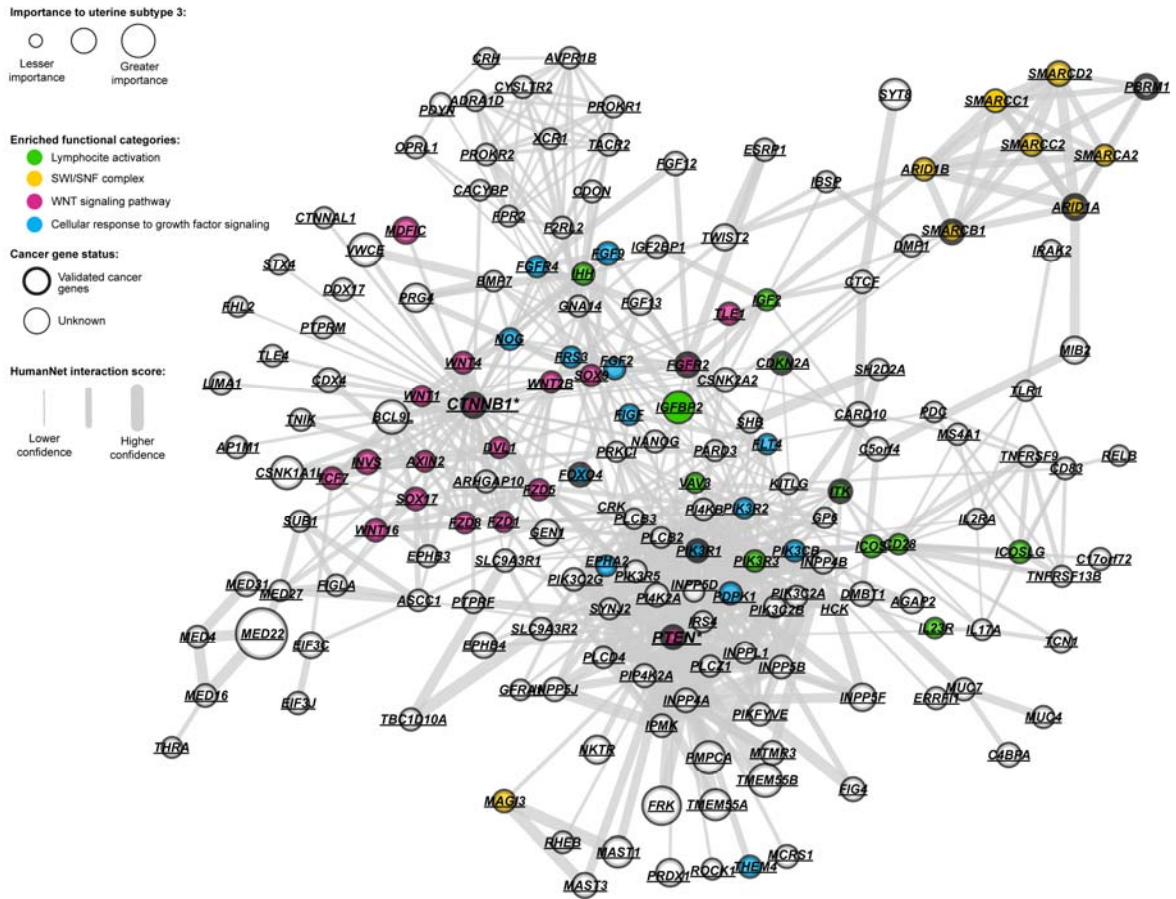

**Supplementary Figure 12. A network view of genes with high smoothed mutation scores in uterine cancer, STRING, subtype 3 relative to other subtypes.** Node size corresponds to smoothed mutation scores. Node color corresponds to a set of functional classes of interest recovered through manual examination of the resulting network with the aid of the GeneMania Cytoscape plugin. Thickened node outlines indicate genes which are known cancer genes from the Sanger list of cancer genes. Edge thickness corresponds to relative edge confidence in the network, underlined gene names indicate the gene is mutated in this subtype.



## Supplementary Figure 13

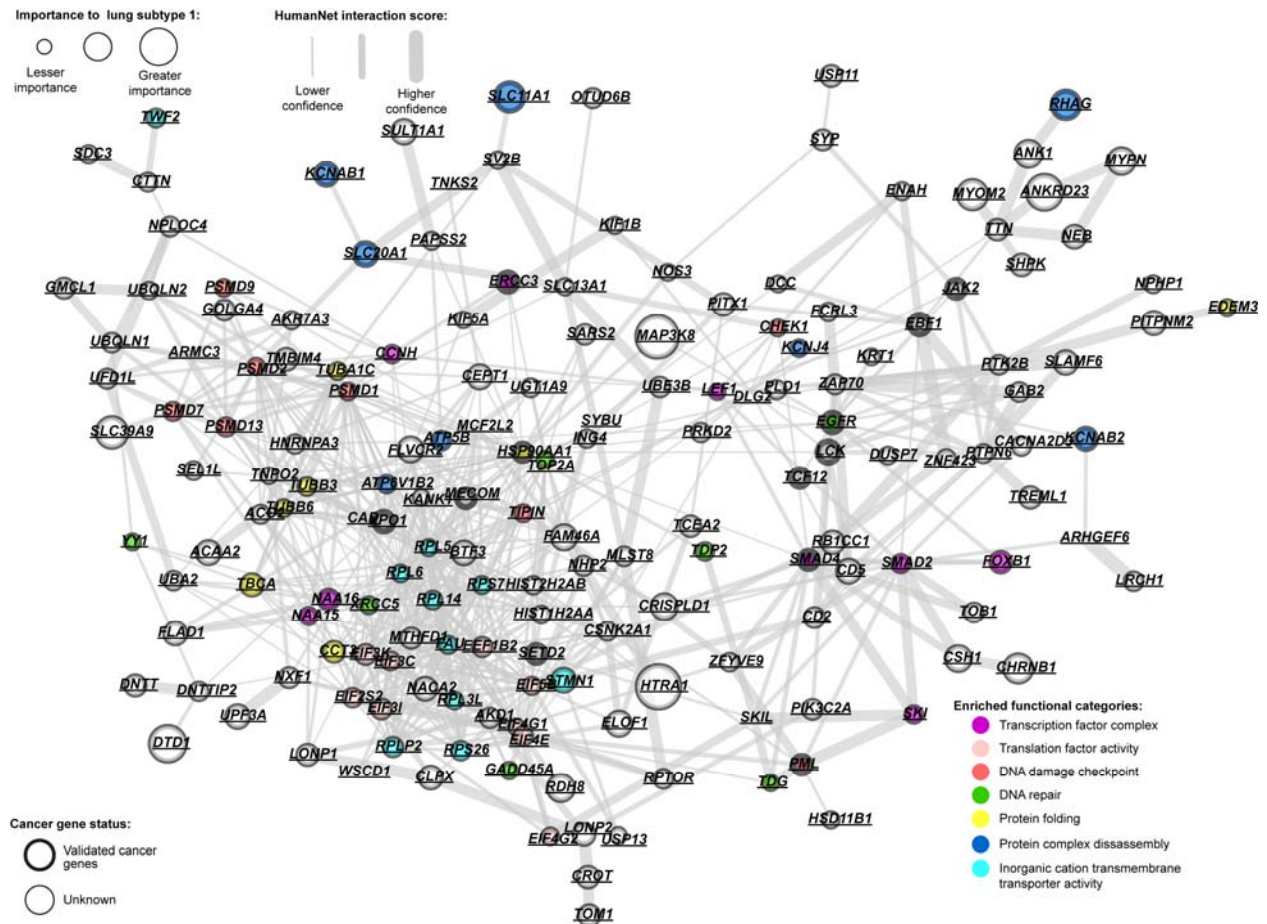

**Supplementary Figure 13. A network view of genes with high smoothed mutation scores in lung cancer, HumanNet, subtype 1 relative to other subtypes.** Node size corresponds to smoothed mutation scores. Node color corresponds to a set of functional classes of interest recovered through manual examination of the resulting network with the aid of the GeneMania Cytoscape plugin. Thickened node outlines indicate genes which are known cancer genes from the Sanger list of cancer genes. Edge thickness corresponds to relative edge confidence in the network, underlined gene names indicate the gene is mutated in this subtype.



## Supplementary Figure 14

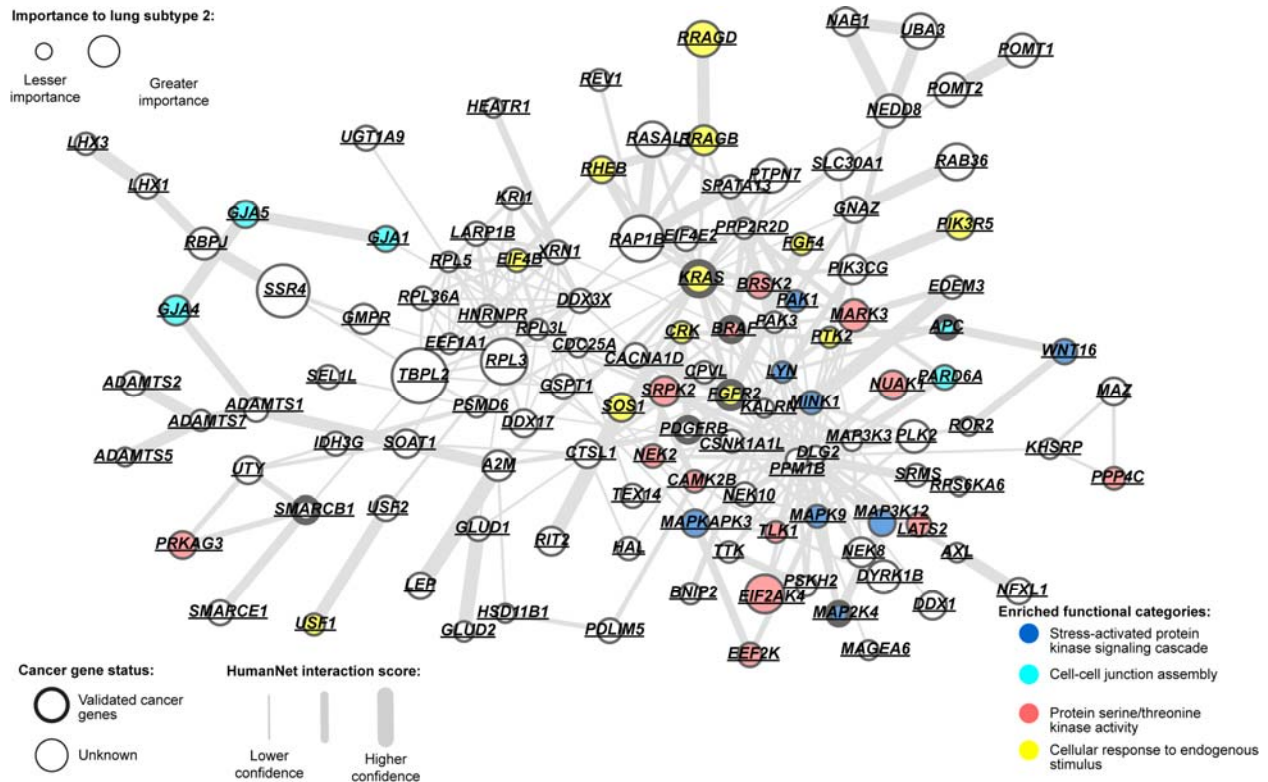

**Supplementary Figure 14. A network view of genes with high smoothed mutation scores in lung cancer, HumanNet, subtype 2 relative to other subtypes.** Node size corresponds to smoothed mutation scores. Node color corresponds to a set of functional classes of interest recovered through manual examination of the resulting network with the aid of the GeneMania Cytoscape plugin. Thickened node outlines indicate genes which are known cancer genes from the Sanger list of cancer genes. Edge thickness corresponds to relative edge confidence in the network, underlined gene names indicate the gene is mutated in this subtype.

## Supplementary Figure 15

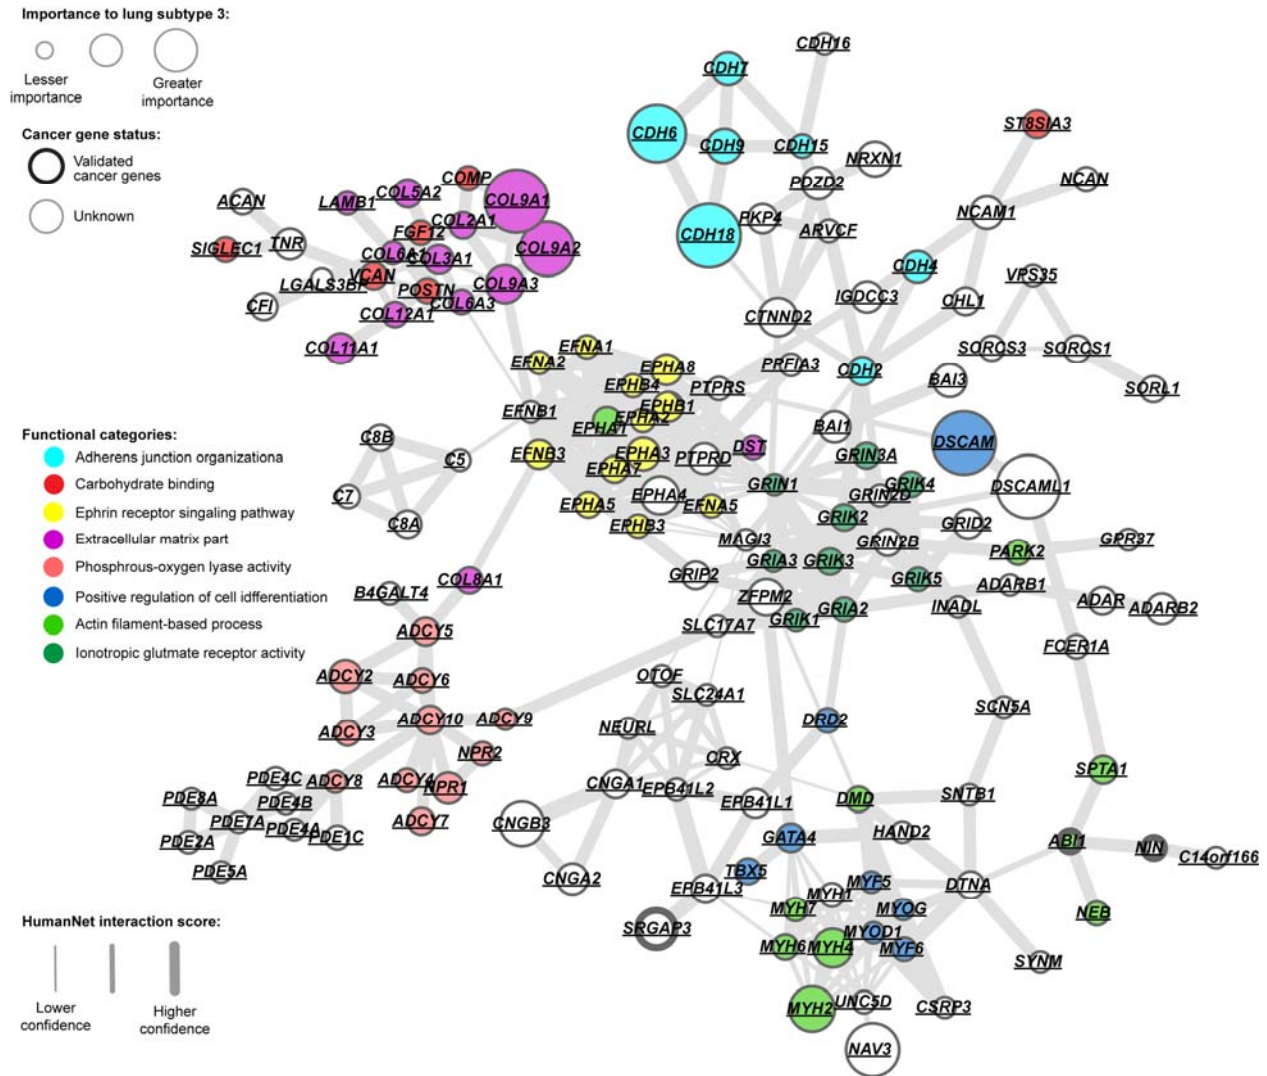

**Supplementary Figure 15.** A network view of genes with high smoothed mutation scores in lung cancer, HumanNet, subtype 3 relative to other subtypes. Node size corresponds to smoothed mutation scores. Node color corresponds to a set of functional classes of interest recovered through manual examination of the resulting network with the aid of the GeneMania Cytoscape plugin. Thickened node outlines indicate genes which are known cancer genes from the Sanger list of cancer genes. Edge thickness corresponds to relative edge confidence in the network, underlined gene names indicate the gene is mutated in this subtype.

## Supplementary Figure 16

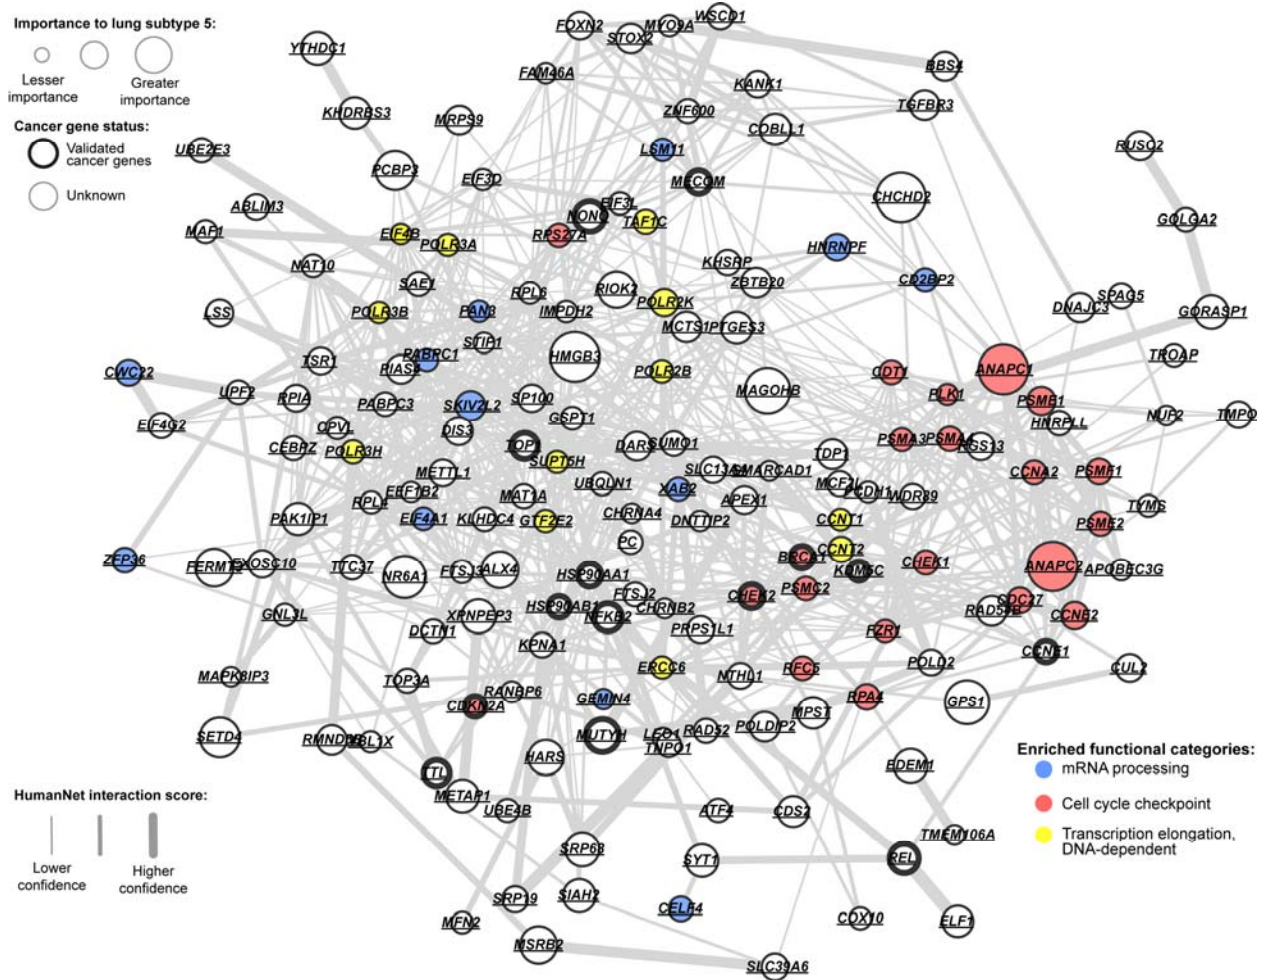

**Supplementary Figure 16. A network view of genes with high smoothed mutation scores in lung cancer, HumanNet, subtype 5 relative to other subtypes.** Node size corresponds to smoothed mutation scores. Node color corresponds to a set of functional classes of interest recovered through manual examination of the resulting network with the aid of the GeneMania Cytoscape plugin. Thickened node outlines indicate genes which are known cancer genes from the Sanger list of cancer genes. Edge thickness corresponds to relative edge confidence in the network, underlined gene names indicate the gene is mutated in this subtype.

## Supplementary Figure 17

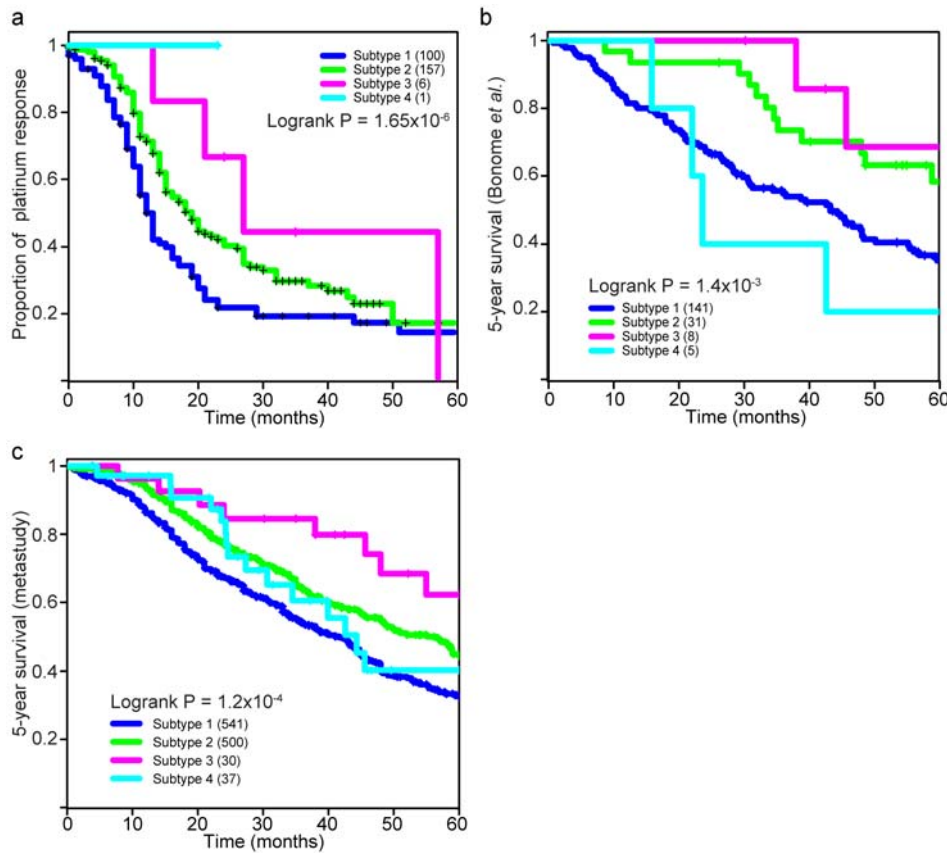

**Supplementary Figure 17. From mutation-derived subtypes to expression signatures.** (a) A Kaplan-Meier analysis of the proportion of patients who acquire platinum resistance in the Tothill *et al.* expression cohort for subtypes defined in the TCGA dataset using somatic mutations and NBS. (b) Kaplan-Meier survival plots for the Bonome *et al.* ovarian cancer patients (c) Kaplan-Meier survival plots for a metastudy of ovarian cancer patients by Györfy *et al.*. These subtypes were recovered using a shrunken centroid model trained on the TCGA expression data with somatic mutation NBS subtypes as labels.

## Supplementary Figure 18

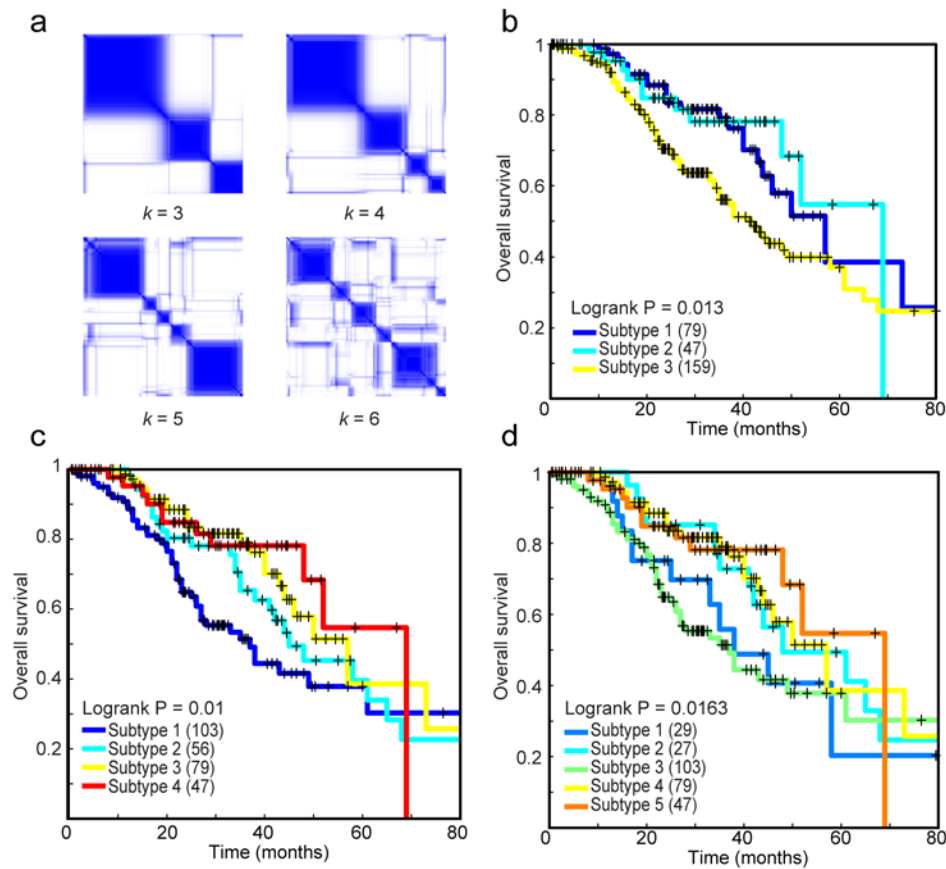

**Supplementary Figure 18. Standard consensus clustering NMF used to recover subtypes in the Tothill *et al.* expression cohort of ovarian tumors.** (a) Standard consensus clustering NMF was performed for 1000 rounds with random restarts on the top 4000 most variable genes in the cohort. Average linkage hierarchical clustering was performed on the co-occurrence matrix to recover the following subtypes. Kaplan-Meier plots are shown for three (b), four (c), and five subtypes (d).



## Supplementary Figure 19

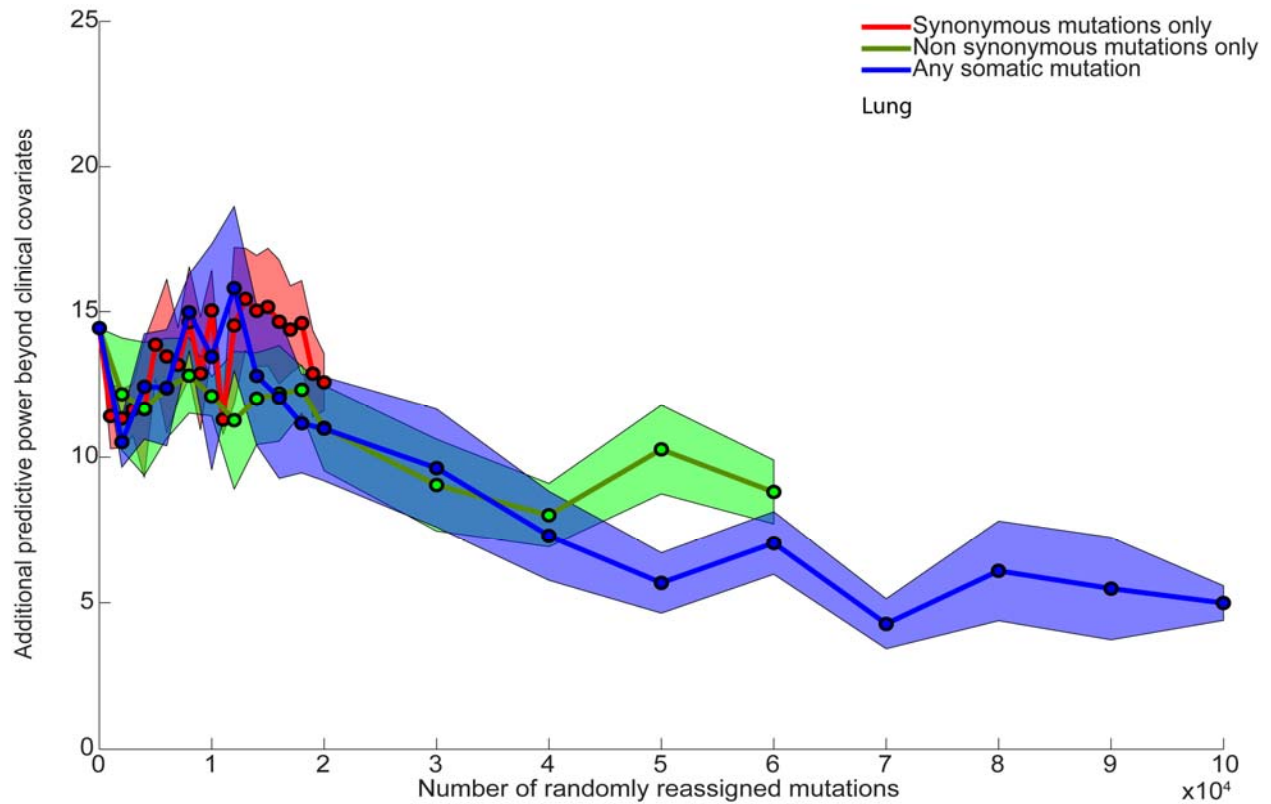

**Supplementary Figure 19 – Effects of progressively permuting proportions of the lung cancer dataset.** Permuting a progressively larger number of mutation uniformly from the entire lung cohort. We report the median likelihood difference of a full model to a base model including just clinical covariates (age, grade, stage, mutation rate, residual tumor after surgery, as well as smoking). The colored regions represent the median absolute deviation (MAD).



## Supplementary Table 1

**Supplementary Table 1. Summary of gene interaction networks.** The table shows the networks used as part of our analysis. The HumanNet and STRING networks were filtered to include the top 10% of interactions according to the interaction weights. After filtering all edges were treated as unweighted.

|                                     | Nodes              | Edges                  | Links and description                                                                                                                                                                                                                                                                                                                        |
|-------------------------------------|--------------------|------------------------|----------------------------------------------------------------------------------------------------------------------------------------------------------------------------------------------------------------------------------------------------------------------------------------------------------------------------------------------|
| <b>HumanNet v.1</b> <sup>23</sup>   | 16,243<br>(7,949)  | 476,399<br>(47,641)    | <a href="http://www.functionalnet.org/humannet">www.functionalnet.org/humannet</a><br>A database of gene interactions, derived using a naive bayes approach by combining multiple lines of experimental evidence. Comprised of both protein-protein interactions (PPIs) and genetic interactions                                             |
| <b>STRING v.9</b> <sup>29</sup>     | 16,560<br>(12,233) | 1,638,830<br>(164,034) | <a href="http://www.string-db.org/">www.string-db.org/</a><br>A database integrating a variety of evidence types including, experimental expression and literature mining approaches to derive a globally weighted network of gene interactions. Comprised of multiple types of gene interactions, including: PPIs, genetic and co-citation. |
| <b>PathwayCommons</b> <sup>30</sup> | 14,355             | 507,757                | <a href="http://www.pathwaycommons.org/pc/">www.pathwaycommons.org/pc/</a><br>An aggregated repository of gene interactions from several sources including BioGrid, HPRD, IntAct and the NCI set of cancer specific pathways. Comprised of mostly physical PPIs.                                                                             |
